# Supplementary material for: SUMOylation of Translationally Regulated Tumor Protein Modulates Its Immune Function
Source: Front Immunol. 2022 Feb 7;13:807097. doi: 10.3389/fimmu.2022.807097 (PMC8858932; doi:10.3389/fimmu.2022.807097)
Supplement: Supplementary Table 2 — Identification of BmTCTP interacting proteins by mass spectrometry in silkworm. [file Table_2.xlsx]

## Sheet: TCTP interaction
Silkbase ID	Protein Name	Molecular weight (kDa)	Sequence length (aa)	Unique peptides (FLAG-TCTP-WT)	Unique peptides (FLAG-TCTP-K164R)	iBAQ (FLAG-TCTP-WT)	iBAQ (FLAG-TCTP-K164R)
KWMTBOMO00487	1-Cys peroxiredoxin	25.041	223	1	3	11811000	5525400
KWMTBOMO05612	25S rRNA (cytosine-C(5))-methyltransferase nop2	89.042	791	1	0	1772300	0
KWMTBOMO10780	26S proteasome non-ATPase regulatory subunit 1	109.79	995	3	2	214050	66681
KWMTBOMO14041	26S proteasome non-ATPase regulatory subunit 13	43.014	385	3	3	851240	2424600
KWMTBOMO01312	26S proteasome non-ATPase regulatory subunit 14	34.569	311	0	1	0	513580
KWMTBOMO11161	26S proteasome non-ATPase regulatory subunit 8	30.709	268	1	0	810520	0
KWMTBOMO10283	26S proteasome non-ATPase subunit 12	51.705	450	1	1	521850	325400
KWMTBOMO10129	26S proteasome non-ATPase subunit 4	39.297	362	0	1	0	695980
KWMTBOMO15518	26S proteasome regulatory ATPase subunit 10B	44.777	396	1	1	400410	704230
KWMTBOMO15123	26S proteasome regulatory subunit 4	49.017	437	2	0	631690	0
KWMTBOMO10965	26S proteasome regulatory subunit 6B	47.082	415	0	1	0	849720
KWMTBOMO00380	3-hydroxyacyl-CoA dehydrogenase	26.931	255	2	0	4827000	0
KWMTBOMO11192	Acetyl transferase	41.377	396	0	3	0	691650
KWMTBOMO14073	Acetyl-CoA carboxylase	171.17	1515	2	0	418540	0
KWMTBOMO04132	Actin-interacting protein 1	65.256	605	1	0	267890	0
KWMTBOMO03720	Actin-related protein 10	43.022	389	1	3	819550	1940400
KWMTBOMO13922	Activator of 90kDa heat shock protein ATPase homolog 1	39.3	341	2	1	2646300	357570
KWMTBOMO05928	Adaptor protein complex-1 gamma subunit	120.03	1080	1	0	228770	0
KWMTBOMO01076	Adenosine kinase	38.127	349	0	2	0	370070
KWMTBOMO05810	Adenylate kinase 9	258.06	2244	2	1	2207200	244100
KWMTBOMO13365	ADP-ribosylation factor-like protein	21.269	187	2	3	20363000	1117100
KWMTBOMO13364	ADP-ribosylation factor-like protein	55.044	473	1	0	590020	0
KWMTBOMO06354	Alanine aminotransferase 1	56.955	516	1	0	1262400	0
KWMTBOMO06377	Alcohol dehydrogenase	40.033	376	2	2	1014700	961130
KWMTBOMO07417	Aminoacylase-1	44.828	399	1	0	513540	0
KWMTBOMO04543	AP-2 complex subunit alpha	104.09	929	1	2	474140	77298
KWMTBOMO04301	AP-2 complex subunit mu	49.888	440	2	0	1790100	0
KWMTBOMO08990	AP-3 complex subunit delta	111.19	992	2	0	1127700	0
KWMTBOMO00930	AP-3 complex subunit sigma-2	21.718	191	1	0	2161200	0
KWMTBOMO07912	Apoptosis inhibitor 5	63.117	556	1	0	858000	0
KWMTBOMO08066	Apoptosis-linked protein 2	20.895	179	1	0	467810	0
KWMTBOMO07140	Argonaute 2	116.63	1038	2	0	952570	0
KWMTBOMO14845	ARP1 actin-related protein 1-like protein A	42.674	376	2	1	1360400	686890
KWMTBOMO09274	Aspartate aminotransferase	46.918	415	1	0	511510	0
KWMTBOMO00300	ATPase family AAA domain-containing protein 3	70.597	631	1	0	156020	0
KWMTBOMO08815	ATP-binding cassette sub-family F member 1	97.319	864	1	0	464450	0
KWMTBOMO07340	ATP-dependent RNA helicase me31b	50.296	441	0	3	0	603740
KWMTBOMO06733	ATP-dependent RNA helicase p62	58.468	515	2	2	1001300	645060
KWMTBOMO09034	ATP-dependent RNA helicase PL10	80.4	714	2	0	1052700	0
KWMTBOMO10537	Axin	71.825	655	1	0	402140	0
KWMTBOMO07328	Barrier-to-autointegration factor B	10.141	90	1	0	4994500	0
KWMTBOMO04740	B-cell receptor-associated protein 31	25.606	224	1	0	4002300	0
KWMTBOMO15359	Bifunctional glutamate/proline--tRNA ligase	82.395	724	3	0	2778100	0
KWMTBOMO13771	BRCA1-A complex subunit Abraxas-like	44.459	397	1	1	2272500	319140
KWMTBOMO05728	CAD protein	248.55	2235	4	6	815570	295780
KWMTBOMO08116	Calnexin	65.502	575	1	0	2153200	0
KWMTBOMO11581	cAMP-dependent protein kinase R2	43.144	382	1	0	283950	0
KWMTBOMO01937	Carnitine O-acetyltransferase	71.269	630	1	0	611940	0
KWMTBOMO08663	Casein kinase 2 beta subunit	26.04	227	1	0	4290100	0
KWMTBOMO09830	Cell division cycle 2	36.976	319	2	0	1872900	0
KWMTBOMO05139	Cell division cycle and apoptosis regulator protein 1-like	123.24	1092	5	0	1391500	0
KWMTBOMO15661	Cell growth-regulating nucleolar protein	47.4	414	1	0	639590	0
KWMTBOMO09788	Cellular retinoic acid binding protein	14.859	132	0	1	0	723170
KWMTBOMO08133	Cholinephosphotransferase 1	45.242	410	1	0	710700	0
KWMTBOMO12866	Chromatin modifying protein 1b	22.114	198	1	0	1880200	0
KWMTBOMO07825	Chromatin-remodeling complex ATPase chain Iswi	118.86	1026	1	0	114780	0
KWMTBOMO06621	Chromobox protein homolog 5	31.851	276	1	0	730910	0
KWMTBOMO15215	Claspin	88.763	807	1	0	188350	0
KWMTBOMO15584	Coatomer protein complex subunit alpha	43.14	370	1	0	2581900	0
KWMTBOMO00638	Coatomer protein complex subunit beta 2	92.545	821	2	2	1352100	307510
KWMTBOMO14417	Coatomer protein complex subunit delta	24.397	216	2	0	2713800	0
KWMTBOMO12389	Coatomer protein complex subunit epsilon	33.251	302	2	1	7773800	1275300
KWMTBOMO13991	Coproporphirynogen oxidase	42.463	363	0	2	0	381610
KWMTBOMO09427	Coronin-6	38.445	346	1	0	1393900	0
KWMTBOMO02648	Cullin-associated NEDD8-dissociated protein 1	138.38	1255	0	1	0	285360
KWMTBOMO15166	Cystathionine beta-synthase	51.874	474	1	0	833490	0
KWMTBOMO06474	Cytochrome c1	33.973	308	1	0	2074700	0
KWMTBOMO06917	Cytosolic Fe-S cluster assembly factor NUBP1	24.961	235	1	0	7114800	0
KWMTBOMO05583	Cytosolic juvenile hormone binding protein 36kDa subunit	31.811	284	2	0	1975200	0
KWMTBOMO07103	Cytosolic malate dehydrogenase	35.463	331	2	1	4964100	1207700
KWMTBOMO06732	DEAD box polypeptide 5	46.036	415	2	0	1014200	0
KWMTBOMO11975	Der1-like domain family member 1	28.907	250	1	0	2333700	0
KWMTBOMO13799	Dicer-2	43.295	386	0	2	0	600210
KWMTBOMO01380	Dihydrolipoyllysine-residue acetyltransferase component of pyruvate dehydrogenase complex	19.491	177	1	0	2865700	0
KWMTBOMO14761	Dihydrolipoyllysine-residue succinyltransferase component of 2-oxoglutarate dehydrogenase complex	50.317	465	2	1	15438000	1423300
KWMTBOMO01149	Diphosphomevalonate decarboxylase	42.904	390	1	0	1784600	0
KWMTBOMO02893	Dm0-like lamin	26.834	240	1	0	3822700	0
KWMTBOMO04080	DNA replication licensing factor Mcm2	42.253	371	1	0	432760	0
KWMTBOMO15293	DNA replication licensing factor Mcm5	81.292	729	0	1	0	90365
KWMTBOMO06463	DNA topoisomerase 2	175.31	1543	4	0	508920	0
KWMTBOMO15127	DNA-directed RNA polymerases I and III subunit RPAC1	38.179	332	1	0	1538700	0
KWMTBOMO02470	Dolichyl-diphosphooligosaccharide--protein glycosyltransferase subunit 1	53.467	468	3	5	798850	1017600
KWMTBOMO13361	Dual specificity testis-specific protein kinase 1	14.67	130	1	0	1494700	0
KWMTBOMO05360	Dynactin subunit 4	54.112	485	1	0	312180	0
KWMTBOMO11867	Dystonin	204.89	1818	1	0	38386	0
KWMTBOMO02914	Electron transfer flavoprotein subunit alpha	34.761	330	3	0	2953700	0
KWMTBOMO01659	Enhancer of mRNA-decapping protein 4	117.14	1096	1	0	200520	0
KWMTBOMO03311	Eukaryotic initiation factor 4B	61.622	536	1	1	729610	369390
KWMTBOMO10493	Eukaryotic translation initiation factor 3 subunit B	80.652	695	1	0	2831800	0
KWMTBOMO09621	Eukaryotic translation initiation factor 3 subunit C	101.59	876	3	0	843820	0
KWMTBOMO10663	Eukaryotic translation initiation factor 3 subunit F	29.607	277	1	1	2760500	727580
KWMTBOMO02081	Eukaryotic translation initiation factor 4A	47.54	420	3	2	7262900	1153600
KWMTBOMO05894	FACT complex subunit spt16	129.4	1139	1	0	55826	0
KWMTBOMO01129	F-actin capping protein subunit beta	30.99	275	2	0	1376100	0
KWMTBOMO11202	F-actin-capping protein subunit alpha	32.457	288	1	0	922610	0
KWMTBOMO02550	Farnesoic acid O-methyltransferase	32.784	312	2	1	9002600	1490100
KWMTBOMO11300	FAS-associated factor 1	56.766	512	1	0	1627600	0
KWMTBOMO06221	Ferrochelatase	44.439	396	1	0	3002300	0
KWMTBOMO04669	Flightless-1	69.477	619	3	0	1666000	0
KWMTBOMO10003	Forkhead box protein K1	26.185	243	2	0	2821800	0
KWMTBOMO06148	Gelsolin	18.049	159	1	0	8939500	0
KWMTBOMO01072	General vesicular transport factor p115	87.523	802	1	0	69427	0
KWMTBOMO12177	Glucose-6-phosphate isomerase	61.982	556	1	0	751140	0
KWMTBOMO12878	Glutamate synthase	224.7	2046	1	1	94091	42988
KWMTBOMO06566	Glutathione S-transferase omega 1	29.069	254	3	0	11936000	0
KWMTBOMO10958	Glycogen synthase kinase-3 beta	46.495	418	1	0	2102700	0
KWMTBOMO01804	Golgi apparatus protein 1	120.48	1048	3	0	371170	0
KWMTBOMO01575	Golgin subfamily A member 4-like	167.64	1480	1	0	4574500	0
KWMTBOMO08105	Growth arrest and DNA damage-inducible proteins-interacting protein 1	29.312	247	0	1	0	529570
KWMTBOMO12903	Guanine nucleotide-binding protein-like 3	37.878	345	1	0	1969100	0
KWMTBOMO14752	H/ACA ribonucleoprotein complex subunit 4	52.616	469	2	0	525490	0
KWMTBOMO13723	H+ transporting ATP synthase O subunit	22.501	209	0	1	0	1294900
KWMTBOMO01743	HEAT repeat-containing protein 1	240.31	2096	1	0	863780	0
KWMTBOMO07776	Heat shock protein 75kDa	78.946	693	1	0	475960	0
KWMTBOMO08110	Hemolin-interacting protein	13.721	121	1	0	2207200	0
KWMTBOMO10467	HGV2 protein	43.859	408	1	0	5180700	0
KWMTBOMO09624	Histone-lysine N-methyltransferase pr-set7	34.539	303	1	1	12607000	462230000
KWMTBOMO02053	Hydroxyacyl-coenzyme A dehydrogenase	82.141	762	2	1	1845700	344550
KWMTBOMO00106	Importin-7	89.255	778	2	0	935200	0
KWMTBOMO04966	Inorganic pyrophosphatase	37.174	334	1	0	1346300	0
KWMTBOMO14627	Interleukin enhancer binding factor	42.079	389	1	0	598430	0
KWMTBOMO12761	Isocitrate dehydrogenase [NAD] subunit alpha	21.571	197	1	0	2080000	0
KWMTBOMO04470	LDLR chaperone boca	21.373	184	1	0	4715300	0
KWMTBOMO16578	Lethal(2) giant larvae protein	104.68	959	1	0	294000	0
KWMTBOMO07104	Leucine-rich PPR motif-containing protein	147.88	1309	2	0	377160	0
KWMTBOMO03347	Leucine-rich repeat protein soc-2	63.079	567	0	1	0	122610
KWMTBOMO09451	Leucine-rich repeat-containing protein 47	58.964	525	3	0	1035000	0
KWMTBOMO14087	Leucine-rich repeat-containing protein DDB G0290503	116.45	1033	1	0	661160	0
KWMTBOMO12742	Lon protease	33.398	304	0	1	0	1656200
KWMTBOMO04413	Loquacious	41.986	379	3	0	4437500	0
KWMTBOMO06483	Maternal protein tudor-like	80.786	725	2	0	360130	0
KWMTBOMO06222	MEMO1 protein	33.314	295	3	0	1794800	0
KWMTBOMO13216	Methionine aminopeptidase 2	52.023	467	1	0	2048700	0
KWMTBOMO10040	Methylglutaconyl-CoA hydratase	32.442	297	2	0	2506300	0
KWMTBOMO11558	Microtubule-associated protein RP/EB family member 3	28.426	254	2	0	2374200	0
KWMTBOMO01506	Mitochondrial 2-oxoglutarate/malate carrier protein	31.458	293	2	0	811410	0
KWMTBOMO01486	Mitochondrial carnitine/acylcarnitine translocase	32.352	298	1	1	1492100	887420
KWMTBOMO03978	Mitochondrial glutamate carrier 1	33.899	314	2	0	1626000	0
KWMTBOMO10966	Mitochondrial import inner membrane translocase subunit Tim9A	10.681	91	1	0	1862000	0
KWMTBOMO15870	Mitochondrial import receptor subunit TOM40	34.171	315	1	0	158400	0
KWMTBOMO11061	Mitochondrial prohibitin complex protein 2	33.176	299	0	4	0	2786900
KWMTBOMO02637	mRNA turnover protein 4	28.033	245	2	0	5118300	0
KWMTBOMO04877	Myosin heavy chain 95F	138.19	1218	1	0	367540	0
KWMTBOMO09055	NAD(P) transhydrogenase	109.58	1047	0	2	0	726370
KWMTBOMO09054	NADPH-specific isocitrate dehydrogenase	49	435	2	0	1197400	0
KWMTBOMO00794	Nascent polypeptide associated complex protein alpha subunit	22.673	211	1	0	1440700	0
KWMTBOMO16284	Neuronal acetylcholine receptor subunit beta-3	69.283	612	0	1	0	521900
KWMTBOMO04342	NFX1-type zinc finger-containing protein 1-like	129.14	1123	1	0	87367	0
KWMTBOMO09641	NIPSNAP protein	31.892	273	1	2	6104300	483600
KWMTBOMO16309	NSFL1 cofactor p47	42.2	390	1	0	341510	0
KWMTBOMO05733	Nuclear pore complex protein Nup155	147.16	1339	2	0	79134	0
KWMTBOMO06548	Nuclear receptor coactivator 5	48.917	437	1	0	156860	0
KWMTBOMO11160	Nuclear valosin-containing protein	89.729	826	2	0	1121800	0
KWMTBOMO08637	Nucleolar complex protein 4 homolog B	58.659	518	1	0	194200	0
KWMTBOMO06561	Nucleolar GTP-binding protein 2	108.48	951	1	0	134340	0
KWMTBOMO15547	Nucleolar protein 56	51.644	462	1	0	732720	0
KWMTBOMO13293	Parp	114.38	1000	5	0	802340	0
KWMTBOMO09900	Phosphatidylethanolamine binding protein	49.861	446	1	0	733250	0
KWMTBOMO09934	Phosphoglycero mutase	28.694	255	1	0	2626400	0
KWMTBOMO05178	Phosphoserine aminotransferase 1	35.067	318	1	0	1019600	0
KWMTBOMO04690	Pre-mRNA-processing-splicing factor 8	275.83	2364	1	0	67088	0
KWMTBOMO00686	Presequence protease	136.71	1192	1	0	514040	0
KWMTBOMO12264	Probable aminopeptidase NPEPL1	55.285	523	2	0	2024200	0
KWMTBOMO04741	Probable dynactin subunit 2	41.409	371	1	1	1113400	139040
KWMTBOMO00687	Probable nucleolar GTP-binding protein 1	73.922	644	1	0	306450	0
KWMTBOMO05623	Probable protein phosphatase CG10417	60.712	566	1	0	604890	0
KWMTBOMO01296	Probable trans-2-enoyl-CoA reductase	133.1	1185	2	1	2179700	147940
KWMTBOMO14826	Probable tyrosyl-DNA phosphodiesterase	70.658	617	1	0	302070	0
KWMTBOMO01796	Prohibitin protein WPH	30.081	274	2	1	4463200	331210
KWMTBOMO13405	Proliferating cell nuclear antigen	29.035	260	1	2	3890400	2341100
KWMTBOMO00499	Prostatic acid phosphatase	46.867	403	1	0	1431700	0
KWMTBOMO02185	Proteasome beta-subunit	27.872	249	1	0	4916400	0
KWMTBOMO00837	Proteasome subunit beta type-4	28.875	262	0	1	0	1013400
KWMTBOMO08865	Protein arginine N-methyltransferase 5	76.418	672	3	0	3739600	0
KWMTBOMO06494	Protein cueball	48.608	435	1	0	1969700	0
KWMTBOMO02468	Protein disulfide-isomerase A6	46.45	424	1	1	360160	1186100
KWMTBOMO06590	Protein disulfide-isomerase TMX3	49.311	425	1	0	459060	0
KWMTBOMO05088	Protein FAM76A	35.956	320	1	0	450420	0
KWMTBOMO14399	Protein FAM98A	37.451	329	1	0	1478100	0
KWMTBOMO14858	Protein hu li tai shao	155.34	1379	0	1	0	47555
KWMTBOMO00786	Protein kinase c inhibitor	13.939	128	1	0	10530000	0
KWMTBOMO16210	Protein lingerer	39.409	380	2	0	9039400	0
KWMTBOMO08579	Protein OPI10	22.499	201	0	1	0	1411300
KWMTBOMO15428	Protein phosphatase 1B	42.046	380	1	0	170600	0
KWMTBOMO06332	Protein-lysine N-methyltransferase mettl10	24.33	215	0	1	0	2237500
KWMTBOMO16063	Protein-methionine sulfoxide oxidase mical3a	27.343	234	1	0	336780	0
KWMTBOMO13567	Protein-methionine sulfoxide oxidase mical3a-like	74.715	693	2	0	1736200	0
KWMTBOMO06595	Puromycin-sensitive aminopeptidase	98.378	865	1	0	659780	0
KWMTBOMO03794	Putative peptidyl-prolyl cis-trans isomerase dodo	17.755	156	0	1	0	898990
KWMTBOMO01579	Putative vesicle associated protein	127.33	1193	1	0	343210	0
KWMTBOMO08241	Pyruvate dehydrogenase	43.933	399	1	0	99765	0
KWMTBOMO13310	Ran-binding protein 3	25.626	238	1	0	1472600	0
KWMTBOMO03171	Ras GTPase-activating protein-binding protein 2	15.65	146	1	0	2256900	0
KWMTBOMO03170	Ras GTPase-activating protein-binding protein 2	19.488	179	0	1	0	1609700
KWMTBOMO01148	Receptor for activated protein kinase C RACK 1	36.04	319	0	2	0	1253000
KWMTBOMO14483	Regulator of chromosome condensation	58.432	552	1	0	483520	0
KWMTBOMO02691	Regulator of microtubule dynamics protein 1	35.049	297	1	0	499470	0
KWMTBOMO04502	Replication protein A1	66.557	598	1	1	1540300	145600
KWMTBOMO07554	Reticulon-3	43.874	408	1	0	637320	0
KWMTBOMO04477	Ribonucleic acid binding protein S1	34.32	306	2	0	3594400	0
KWMTBOMO07327	Ribonucleoside-diphosphate reductase large subunit	90.676	798	5	0	390820	0
KWMTBOMO09232	Ribosomal protein L10A	24.59	217	2	2	2530600	2419700
KWMTBOMO01320	Ribosomal protein L11	22.296	195	2	1	30861000	3778000
KWMTBOMO02724	Ribosomal protein L13	25.139	220	5	3	22557000	10085000
KWMTBOMO01273	Ribosomal protein L13A	23.357	204	3	0	15887000	0
KWMTBOMO03314	Ribosomal protein L15	24.038	204	1	0	2526900	0
KWMTBOMO06026	Ribosomal protein L21 39S	19.534	176	1	0	551140	0
KWMTBOMO08064	Ribosomal protein L27A	16.534	148	1	0	25859000	0
KWMTBOMO08399	Ribosomal protein L28	15.974	139	2	1	20553000	6906100
KWMTBOMO13074	Ribosomal protein L37	10.68	93	1	0	5150900	0
KWMTBOMO07264	Ribosomal protein L38 39S	46.538	394	1	0	723470	0
KWMTBOMO10049	Ribosomal protein L38 60S	8.2408	70	1	1	13185000	1420400
KWMTBOMO08797	Ribosomal protein L5	34.293	299	3	1	1807100	398380
KWMTBOMO08699	Ribosomal protein L7A	30.293	268	5	3	34372000	6821600
KWMTBOMO08983	Ribosomal protein L8 60S	27.918	257	0	1	0	1986400
KWMTBOMO07772	Ribosomal protein S10	18.192	160	2	0	1864100	0
KWMTBOMO16357	Ribosomal protein S11	18.203	156	1	1	15935000	2315400
KWMTBOMO11987	Ribosomal protein S12	15.034	139	1	0	2043700	0
KWMTBOMO13960	Ribosomal protein S13	17.22	151	1	2	10633000	1631300
KWMTBOMO05723	Ribosomal protein S15A	14.692	129	1	3	2033200	11398000
KWMTBOMO00974	Ribosomal protein S21 40S	9.0883	83	0	1	0	4452900
KWMTBOMO08666	Ribosomal protein S23	15.995	143	0	2	0	6726500
KWMTBOMO15114	Ribosomal protein S25	13.419	119	1	1	8096900	8807300
KWMTBOMO03951	Ribosomal protein S27	9.433	84	1	1	5135100	759370
KWMTBOMO13859	Ribosomal protein S30	14.288	130	0	1	0	8648100
KWMTBOMO06242	Ribosomal protein S35 28S	39.822	343	0	1	0	164870
KWMTBOMO12018	Ribosomal protein S7	21.857	190	2	1	8085500	797570
KWMTBOMO09205	Ribosomal protein S8	23.791	208	3	2	5566400	1213000
KWMTBOMO10248	Ribosomal protein SA 40S	33.394	306	2	3	4984700	8281800
KWMTBOMO05532	Ribosome maturation protein SBDS	28.554	251	1	0	1947700	0
KWMTBOMO08691	RNA-binding protein	16.79	142	1	0	3175400	0
KWMTBOMO01914	RNA-binding protein 39	58.429	514	2	0	852690	0
KWMTBOMO01064	RNA-binding protein lark	38.515	343	4	3	3819900	489070
KWMTBOMO14478	rRNA 2'-O-methyltransferase fibrillarin 1	10.439	95	1	0	13336000	0
KWMTBOMO14479	rRNA 2'-O-methyltransferase fibrillarin 2	15.77	158	1	0	1661600	0
KWMTBOMO13287	RuvB-like helicase 1	49.926	456	0	1	0	542850
KWMTBOMO05092	S-adenosylmethionine synthetase	44.527	404	1	1	1970800	306390
KWMTBOMO10416	Serine hydroxymethyltransferase	43.143	394	2	1	7078300	263880
KWMTBOMO07555	Serine palmitoyltransferase 2	55.553	510	0	1	0	224490
KWMTBOMO09130	Serine/arginine-rich splicing factor 4	41.262	377	2	0	839350	0
KWMTBOMO09170	Serine/threonine-protein kinase polo	65.555	569	1	0	197930	0
KWMTBOMO11680	Seryl-tRNA synthetase	55.621	494	0	1	0	397790
KWMTBOMO02241	Signal peptidase complex subunit 2	20.593	184	1	0	1993900	0
KWMTBOMO15121	Signal recognition particle 54kDa protein	55.161	501	2	0	465680	0
KWMTBOMO10488	Small G protein	22.802	200	1	1	3275900	684280
KWMTBOMO11616	Sorting nexin-2	52.922	468	1	0	1173800	0
KWMTBOMO14146	Sorting nexin-6	48.512	421	1	1	1324700	210370
KWMTBOMO05625	Spatacsin	224.12	1950	1	0	507060	0
KWMTBOMO03860	Splicing factor arginine/serine-rich 6	33.065	286	2	0	1796500	0
KWMTBOMO07373	Splicing factor proline/glutamine-rich protein 1	17.612	142	1	0	2327700	0
KWMTBOMO07374	Splicing factor proline/glutamine-rich protein 2	57.591	505	3	0	4620200	0
KWMTBOMO03169	Squid protein	32.469	303	1	0	1176100	0
KWMTBOMO01666	Stathmin	38.375	335	1	0	249480	0
KWMTBOMO07177	Striatin	75.547	690	2	0	649520	0
KWMTBOMO16287	Structural maintenance of chromosomes protein 4	145.74	1285	1	0	24110	0
KWMTBOMO06787	SUMO-activating enzyme subunit 2	67.003	608	1	0	266810	0
KWMTBOMO00391	Surfeit 1	27.383	236	0	1	0	322110
KWMTBOMO03979	SWI/SNF complex subunit SMARCC2	91.851	831	2	0	272980	0
KWMTBOMO00181	Syntaxin-7	29.884	262	2	0	1384200	0
KWMTBOMO00989	Talin-1	233.25	2120	1	0	20588	0
KWMTBOMO00793	T-complex protein 1 subunit epsilon	58.77	542	3	0	2271300	0
KWMTBOMO09355	Thiol peroxiredoxin	21.916	195	1	2	241890	2099600
KWMTBOMO16437	Titin	32.295	289	1	0	784650	0
KWMTBOMO07821	Transaldolase	37.118	332	1	0	2126300	0
KWMTBOMO11059	Transcriptional regulator ATRX	214.71	1886	1	0	70345	0
KWMTBOMO02278	Translationally controlled tumor protein	19.86	172	3	1	14606000	1248800
KWMTBOMO01918	Transport protein Sec61 beta subunit	10.121	97	2	0	2802700	0
KWMTBOMO12205	Trifunctional enzyme subunit beta	50.985	473	2	0	1229300	0
KWMTBOMO06835	U3 small nucleolar RNA-associated protein 6	67.143	568	1	1	4219600	220980
KWMTBOMO10243	Ubiquitin carboxyl-terminal hydrolase 7-like	130.11	1120	1	0	44833	0
KWMTBOMO09066	Ubiquitin carboxyl-terminal hydrolase FAF-X	28.334	253	1	0	503930	0
KWMTBOMO00491	Ubiquitin carboxyl-terminal hydrolase isozyme L5	37.231	322	1	0	971670	0
KWMTBOMO07117	Ubiquitin-conjugating enzyme E2-17 kDa	16.744	147	0	1	0	7452100
KWMTBOMO00718	UBX domain-containing protein 4	53.992	489	1	1	1663200	144300
KWMTBOMO03509	Uncharacterized protein	26.368	243	1	0	10058000	0
KWMTBOMO06593	Uncharacterized protein	16.425	144	1	1	9117400	439700
KWMTBOMO10128	Uncharacterized protein	12.597	107	1	1	6627200	938150
KWMTBOMO15757	Uncharacterized protein	24.025	211	1	0	6549000	0
KWMTBOMO08654	Uncharacterized protein	8.5639	73	1	0	4805000	0
KWMTBOMO05057	Uncharacterized protein	41.416	368	2	0	2283600	0
KWMTBOMO00834	Uncharacterized protein	66.545	593	1	0	2030100	0
KWMTBOMO05111	Uncharacterized protein	62.046	561	3	0	2024200	0
KWMTBOMO09657	Uncharacterized protein	103.54	892	5	0	1982200	0
KWMTBOMO06228	Uncharacterized protein	19.545	180	1	0	1259900	0
KWMTBOMO04458	Uncharacterized protein	94.543	869	3	0	1219600	0
KWMTBOMO14422	Uncharacterized protein	91.506	813	4	1	1000700	126960
KWMTBOMO13056	Uncharacterized protein	60.745	532	1	0	641910	0
KWMTBOMO15715	Uncharacterized protein	180.28	1615	2	0	328440	0
KWMTBOMO12968	Uncharacterized protein	219.6	1949	3	0	299810	0
KWMTBOMO02579	Uncharacterized protein	96.122	855	1	0	265560	0
KWMTBOMO11517	Uncharacterized protein	116.84	1036	1	0	219880	0
KWMTBOMO03397	Uncharacterized protein	191.17	1668	2	0	186930	0
KWMTBOMO06507	Uncharacterized protein	122.73	1128	1	0	153010	0
KWMTBOMO10793	Uncharacterized protein	135.76	1212	1	0	152990	0
KWMTBOMO14780	Uncharacterized protein	65.572	592	1	0	144430	0
KWMTBOMO12206	Uncharacterized protein	102.33	924	1	0	103420	0
KWMTBOMO06157	Uncharacterized protein	271.28	2399	3	0	71340	0
KWMTBOMO15990	Uncharacterized protein	190.11	1722	1	0	30594	0
KWMTBOMO06762	Uncharacterized protein	27.192	231	0	1	0	742650
KWMTBOMO10227	Uncharacterized protein	29.394	260	0	1	0	690610
KWMTBOMO13663	Uncharacterized protein	110.69	991	0	1	0	127890
KWMTBOMO02785	UPF0585 protein C16orf13 homolog A	25.488	226	1	0	643350	0
KWMTBOMO05013	Vacuolar protein sorting-associated protein 13C	264.73	2363	2	0	212490	0
KWMTBOMO02354	Very long-chain specific acyl-CoA dehydrogenase	66.411	625	1	0	180340	0
KWMTBOMO00362	Vesicle-associated membrane protein-associated protein B	31.76	282	1	1	678970	552290
KWMTBOMO14477	WD repeat-containing protein 43	69.425	628	2	0	494350	0
KWMTBOMO06756	WW domain-binding protein 2	30.907	293	1	1	10133000	1186200
KWMTBOMO05034	Zinc finger protein 830	34.296	294	1	0	679980	0
KWMTBOMO01096	Zinc finger with UFM1-specific peptidase domain protein-like	81.509	733	1	0	288850	0
